# Supplementary material for: Transcriptome Sequencing from Diverse Human Populations Reveals Differentiated Regulatory Architecture
Source: PLoS Genet. 2014 Aug 14;10(8):e1004549. doi: 10.1371/journal.pgen.1004549 (PMC4133153; doi:10.1371/journal.pgen.1004549)
Supplement: Table S3 — Novel transcribed region metrics across populations. (XLSX) [file pgen.1004549.s022.xlsx]

## Sheet: Sheet1
Population	Regions Expressed >=1 RPKM Across All Individuals	Average RPKM of Regions Expressed >=1 RPKM Across All Individuals	Regions Expressed >=1 RPKM Across All Individuals and Not Present in Other Populations	Average RPKM of Uniquely Expressed Regions
Cambodian	132	43.3	0	--
Maya	129	42.5	0	--
Mbuti Pygmies	334	19.9	0	--
Mozabite	115	52.2	0	--
Pathan	477	13.2	0	--
San	343	16.3	1	1.4
Yakut	132	43.4	0	--
Total	51	99.5
